# Supplementary material
Source: Springer Nature journal article supplement (https://www.springermedizin.de/resource/supplementary/12888_2013_1843_MOESM1_ESM.pdf/9481502)
Supplement: MOESM1 [file 9481502]

Persons admitted at least 3 days with moderate-severe depression from 1.1.1996-31.5.2008 (index admission)

$n = 1,808$

( $n_{\text{Non-Western immigrants}}=363, n_{\text{Danish-born residents}}=1,445$ )

Admitted with depression in the 6 months preceding the index admission

$n = 55$

( $n_{\text{Non-Western immigrants}}=9, n_{\text{Danish-born residents}}=46$ )

Filled an AD prescription in the 6 months preceding the index admission

$n = 1,161$

( $n_{\text{Non-Western immigrants}}=196, n_{\text{Danish-born residents}}=965$ )

Emi- or immigrated in the 12 months preceding the index admission

$n = 27$

( $n_{\text{Non-Western immigrants}}=20, n_{\text{Danish-born residents}}=7$ )

Filled an AD prescription during the index admission (more than 1 day before discharge)

$n = 14$

( $n_{\text{Non-Western immigrants}}=1, n_{\text{Danish-born residents}}=13$ )

Died or emigrated less than 30 days after discharge

$n = 6$

( $n_{\text{Non-Western immigrants}}=0, n_{\text{Danish-born residents}}=6$ )

Admitted to psychiatric or somatic ward less than 30 days after discharge and before AD purchasing

$n = 10$

( $n_{\text{Non-Western immigrants}}=2, n_{\text{Danish-born residents}}=8$ )

Missing income information

$n = 7$

( $n_{\text{Non-Western immigrants}}=3, n_{\text{Danish-born residents}}=4$ )

**Study population**

$n = 528$

( $n_{\text{Non-Western immigrants}}=132, n_{\text{Danish-born residents}}=396$ )
